# Supplementary material for: The Dwarf Phenotype in GH240B Mice, Haploinsufficient for the Autism Candidate Gene Neurobeachin, Is Caused by Ectopic Expression of Recombinant Human Growth Hormone
Source: PubMed Central journal article supplement (PMC4198124; doi:10.1371/journal.pone.0109598), 2014-10-15
Supplement: pone.0109598.s001.pdf [file pone.0109598.s001.pdf]

**Table S1:** Primers per gene used for quantitative reverse transcription PCR.

|                 | <u>Forward</u>             | <u>Reverse</u>        |
|-----------------|----------------------------|-----------------------|
| <i>Nbea</i>     | CTTTGTGCGGATCAACAGG        | CATTGATGGAGTTGGCAAGA  |
| <i>Gh</i>       | CCTCAGCAGGATTTTCACCA       | CTTGAGGATCTGCCCAACAC  |
| <i>Ghr</i>      | CCAGGATCTATTCAGCTGTACTATGC | TGGGTCCATTCATGAGCAATT |
| <i>Ghrh</i>     | GCAGAACCTCAATCGGAGAG       | TGGTGAGGATGAGGATCACA  |
| <i>Ghrhr</i>    | ACCCGTATCCTCTGCTTGCT       | AGGTGTTGTTGGTCCCCTCT  |
| <i>Sst</i>      | CCCAGACTCCGTCAGTTTCT       | GGGCATCATTCTCTGTCTGG  |
| <i>Sstr2</i>    | GAGGCCTTTCCCCTAGAGTT       | CACCGTAACGCTTGTCCTT   |
| <i>Sstr4</i>    | TCTGCATCGTCCTGGCTTT        | CTTGGCCAGTTCCTGTTTCC  |
| <i>Sstr5</i>    | TGGTCTTTGGGAAGGTGAAAG      | TGTCCACAGTCGGAAATGGT  |
| <i>Ghrelin</i>  | CCAGAGGACAGAGGACAAGC       | CATCGAAGGGAGCATTGAAC  |
| <i>Ghrelinr</i> | GACCAGAACCACAAACAGACAG     | GGCTCGAAAGACTTGGA AAA |
| <i>hGH</i>      | CCAGGAGTTTGAAGAAGCCT       | GGAGGTCATAGACGTTGCTGT |
| <i>Igf-1</i>    | GCTCTTCAGTTCGTGTGTGGAC     | CATCTCCAGTCTCCTCAGATC |
| <i>Gapdh</i>    | ATGGCCTTCCGTGTTTCT         | CAGGCGGCACGTCAGAT     |

The sequences of the primers are presented in a 5' to 3' orientation. *Gh*: growth hormone; *Ghr*: Gh receptor; *Ghrh*: Gh-releasing hormone; *Ghrhr*: Ghrh receptor; *Sst*: somatostatin; *Sstr*: Sst receptor; *Ghrelinr*: Ghrelin receptor; *hGH*: human GH; *Igf-1*: insulin-like growth factor 1; *Gapdh*: glyceraldehyde 3-phosphate dehydrogenase.
